# Supplementary material for: Role of MYC-miR-29-B7-H3 in Medulloblastoma Growth and Angiogenesis
Source: PubMed Central journal article supplement (PMC6723910; doi:10.3390/jcm8081158), 2019-08-02
Supplement: jcm-08-01158-s001.pdf [file jcm-08-01158-s001.pdf]

## Supplementary Methods:

### MTT Assay

MTT assay (ThermoFisher, Carlsbad, CA, M6494) was carried out using standard protocol (79). Briefly, cells were plated onto 96-well plates in 5 replicates at 20,000 cells/well. Cells were incubated with a range of JQ1 concentrations, from 2  $\mu$ M, 1  $\mu$ M, 0.5  $\mu$ M to 0.125  $\mu$ M and ATRA concentrations from 4  $\mu$ M, 2  $\mu$ M, 1  $\mu$ M, and 0.5  $\mu$ M for 24 hrs. Media was removed, and cells were incubated with the MTT reagent (0.5  $\mu$ g/mL) and incubated at 37°C for 2 hrs. DMSO was added to each well to dissolve the formazan crystals, after 30 min incubation the absorbance was measured at 550 nm using an xMark microplate spectrophotometer (Benchmark, Bio-Rad, Hercules, CA).

### TUNEL assay

TUNEL assay was done using an *in situ* cell death detection kit (Roche Applied Science, Indianapolis, IN) according to the manufacturer's protocol. Briefly, cells on 8-well chambered slides were fixed using 4% paraformaldehyde. Next, cells were incubated with a TUNEL reaction mixture for 60 min at 37° C in a humidified incubator. Before mounting, the slides were washed with PBS and incubated for 5 min with a 1:100 dilution of 4'-6-diamidino-2-phenylindole (DAPI) for nuclear staining and analyzed using confocal microscopy (Olympus BX61 Fluoview) at 40 $\times$  magnification. The percentage of apoptotic cells observed by TUNEL staining was gathered using ImageJ software.

**Table S1: Primer List**

|       |         |                       |
|-------|---------|-----------------------|
| B7-H3 | Forward | CACCCTACGCTGCTCCTTTTC |
|       | Reverse | CCCTCGTCGGTACTCGGA    |
| Myc   | Forward | GCTGCTTAGACGCTGGATTT  |

|        |         |                         |
|--------|---------|-------------------------|
|        | Reverse | GAGTCGTAGTCGAGGTCATAGTT |
| miR-29 | Forward | CAGAGACTTGAGCATCTGTG    |
|        | Reverse | AACCGATTTCAGATGGTGC     |
| STAT1  | Forward | CAGCTTGACTCAAATTCCTGGA  |
|        | Reverse | TGAAGATTACGCTTGCTTTTCCT |
| MMP-9  | Forward | AGACCTGGGCAGATTCCAAAC   |
|        | Reverse | CGGCAAGTCTTCCGAGTAGT    |
| VEGFR2 | Forward | ATCCTCCCCCGCATCA        |
|        | Reverse | GCTCGTTGGCGCACTCTT      |
| PTEN   | Forward | TTGAAGACCATAACCCACCAC   |
|        | Reverse | ATTACACCAGTTCGTCCCTTTC  |
| JAK1   | Forward | CTTTGCCCTGTATGACGAGAAC  |
|        | Reverse | ACCTCATCCGGTAGTGGAGC    |
| U6     | Forward | CGCTTCGGCAGCACATATAC    |
|        | Reverse | AAAATATGGAACGCTTCACGA   |
| Actin  | Forward | ACTCTTCCAGCCTTCCTTCC    |
|        | Reverse | TCTCCTTCTGCATCCTGTCG    |

**Table S2: ChIP primers for the *B7-H3* gene promoter**

| <b>Region</b> | <b>Forward Primer</b> | <b>Reverse Primer</b> |
|---------------|-----------------------|-----------------------|
| RI            | CACTGTGGTTCTGCCTCACA  | CCAGGCAGAGGAAAGAGCAA  |
| RII           | ACGTCTGCATGACTGGATCC  | GAGTGCTTCCTGTGTGCCAA  |
| RIII          | CTCACTGCAACCTCCACCTC  | CGGTTTCAGCTGTCCCTGTA  |
| RIV           | GACGAGAATCTGTGTGCCCA  | TCTTCAGGGACCTGGACCTC  |
| RV            | AACCTCATCTGGCAGCTGAC  | AATCAGCACTGGGGTTCTGG  |
| RVI           | TCACCTCCAGCTCCCTACTC  | TGGTGACAGAGCTGTGCG    |
| RVII          | TCTGGAAGCCTCTGGGAAGA  | CTCTAGGCTACCACCCGAGT  |
| RVIII         | CTTCCCCTTGGTTCACCCTC  | TGGTCACGTTGCCAGTCAG   |

### **Supplementary Figures:**

**Supplementary Figure 1:** B7-H3 and MYC expression in MB subtypes. A. Transcript levels of B7-H3 compared to PD-L1 and CTLA-4 levels in MB datasets from Pfister and Gilbertson. B. B7-H3 and MYC transcript levels from Northcott dataset showing positive correlation across MB subtypes. C. B7-H3 and MYC transcript levels from Cavalli dataset showing positive correlation across MB samples. D. Transcript levels of B7-H3, c-MYC, and n-MYC from RT-PCR of D283 and D425 cells. E. MTT assay showing cell viability of D283 and D425 cells treated with JQ1 (0.5, 1.0, 2.0  $\mu$ M) for 24 hrs. IC50 value for drug treatments of 1  $\mu$ M was used in this study.

**Supplementary Figure 2:** Transfections induce B7-H3 and miR-29 upregulation *in vitro*. A. Immunoblot of D283 cells transfected with shMYC plasmid showing decreased levels of MYC and B7-H3 protein expression. Actin used as loading control. B RT-PCR data showing miR-29 levels in control D283, D425, and D458 cells. C. Immunoblot of D283 cells showing improved inhibition of B7-H3 expression with miR-29 transfection compared to shB7-H3. D. Immunoblot of D283, D425, and D458 cells transfected with B7-H3 OE plasmid observing MYC and B7-H3 protein levels. Actin used as loading control. E. RT-PCR data of D283, D425 and D458 cells transfected with miR-29 or B7-H3 OE plasmid evaluating miR-29 and B7-H3 transcript levels.

**Supplementary Figure 3:** miR-29 overexpression induces global tumor suppressive effects in MB. A. Upstream Regulator Analysis of RNA-seq data showing probable effect of miR-29 transfection on the activity of relevant signaling pathways. B. Bar graph from IPA of RNA-seq data showing up- (orange) or downregulation (blue) of labelled pathways from miR-29 transfection.

**Supplementary Figure 4:** miR-29 in combination with JQ1 or ATRA increase MB cell apoptosis *in vitro*. A. Graphs from FACS analysis showing increased concentration of apoptotic cells in miR-29 + JQ1 and miR-29 + ATRA across D283, D425, and D458 cell lines. B. TUNEL staining (green) showing high concentration of apoptotic cells in miR-29 + JQ1 treated D283, D425, and D458 cells when compared to control or miR-29 transfection alone. DAPI (blue) was used to stain cell nuclei.
